# Supplementary material
Source: PubMed Central journal article supplement (PMC1276096)
Supplement: pnas_0507949102_3.pdf [file pnas_0507949102_3.pdf]

Table 1. Data collection and refinement statistics

| <i>Data collection statistics:</i>               |                           |                                                      |                                                |                                                             |                                               |                            |                                                  |
|--------------------------------------------------|---------------------------|------------------------------------------------------|------------------------------------------------|-------------------------------------------------------------|-----------------------------------------------|----------------------------|--------------------------------------------------|
| <i>Dataset:</i>                                  | <b>L28B2<br/>(native)</b> | <b>L28C6<br/>HgCl<sub>2</sub></b>                    | <b>L28D2<br/>K<sub>2</sub>PtCl<sub>4</sub></b> | <b>L88A4<br/>(NH<sub>4</sub>)<sub>2</sub>WS<sub>4</sub></b> | <b>L88C1<br/>K<sub>2</sub>OsO<sub>4</sub></b> | <b>L88A2<br/>EtOHg</b>     | <b>L88B3_2<br/>Ta<sub>6</sub>Br<sub>14</sub></b> |
| Temperature                                      | RT (290K)                 |                                                      |                                                |                                                             |                                               |                            |                                                  |
| Spacegroup                                       | I4                        |                                                      |                                                |                                                             |                                               |                            |                                                  |
| a=b=, Å                                          | 140.7                     | 140.9                                                | 140.8                                          | 140.2                                                       | 140.6                                         | 141.0                      | 140.9                                            |
| c=, Å                                            | 97.4                      | 97.8                                                 | 97.8                                           | 97.3                                                        | 98.7                                          | 96.8                       | 96.4                                             |
| Resolution, Å<br>(final shell)                   | 48.8 – 3.5<br>(3.7 – 3.5) | 48.8 – 3.4<br>(3.6 – 3.4)                            | 40.5 – 3.5<br>(3.7 – 3.5)                      | 42.3 – 2.5<br>(2.7 – 2.5)                                   | 40.5 – 3.0<br>(3.16 – 3.0)                    | 28.7 – 3.4<br>(3.58 – 3.4) | 48.2 – 2.8<br>(2.97 – 2.8)                       |
| Reflections<br>unique (total)                    | 12100<br>(45984)          | 13281<br>(49702)                                     | 12002<br>(35629)                               | 30889<br>(114411)                                           | 18290<br>(36609)                              | 12785<br>(30504)           | 22711<br>(85677)                                 |
| Completeness (%)<br>overall (final shell)        | 100.0 (100.0)             | 100.0 (100.0)                                        | 98.9 (99.8)                                    | 99.0 (93.7)                                                 | 95.2 (97.6)                                   | 97.4 (98.8)                | 99.2 (95.3)                                      |
| I/σ <sub>1</sub> overall<br>(final shell)        | 2.8 (1.3)                 | 4.1 (2.2)                                            | 3.3 (1.3)                                      | 7.9 (2.4)                                                   | 2.9 (0.6)                                     | 4.5 (2.1)                  | 2.6 (1.5)                                        |
| <sup>a</sup> R <sub>merge</sub> overall          | 21 %                      | 15.7 %                                               | 18.3 %                                         | 7.7 %                                                       | 19.4 %                                        | 13.7 %                     | 15.4 %                                           |
| Number of heavy<br>atom sites                    | -                         | 4                                                    | 10                                             | 4                                                           | 3                                             | 12                         | 1×6                                              |
| <sup>b</sup> Phasing power<br>(centric/acentric) | -                         | 0.92/1.2                                             | 0.79/1.2                                       | 0.56/0.89                                                   | 0.81/1.03                                     | 1.07/1.45                  | 1.05/1.15                                        |
| <sup>c</sup> FOM (MIR)                           | 0.58                      | -                                                    | -                                              | -                                                           | -                                             | -                          | -                                                |
| <i>Refinement statistics:</i>                    |                           |                                                      |                                                |                                                             |                                               |                            |                                                  |
| <i>Dataset:</i>                                  | <b>L18B1<br/>(native)</b> |                                                      |                                                |                                                             |                                               |                            |                                                  |
| Temperature                                      | 90K                       | Number of atoms                                      |                                                |                                                             | 6445                                          |                            |                                                  |
| Spacegroup                                       | I4                        | Number of solvent molecules                          |                                                |                                                             | 468                                           |                            |                                                  |
| a=b=, Å                                          | 138.9                     | Number of bounded buffer molecule atoms              |                                                |                                                             | 66                                            |                            |                                                  |
| c=, Å                                            | 94.1                      |                                                      |                                                |                                                             |                                               |                            |                                                  |
| Resolution, Å<br>(final shell)                   | 28.0 – 1.9<br>(2.0 – 1.9) | Test set size                                        |                                                |                                                             | 10% random                                    |                            |                                                  |
| Reflections<br>unique (total)                    | 70374<br>(268268)         | <sup>d</sup> R <sub>cryst</sub> (R <sub>free</sub> ) |                                                |                                                             | 0.187 (0.218)                                 |                            |                                                  |
| Completeness (%)<br>overall (final shell)        | 99.9 (100.0)              | RMS bonds/angles                                     |                                                |                                                             | 0.017 Å/1.6°                                  |                            |                                                  |
| I/σ <sub>1</sub> overall<br>(final shell)        | 10.4 (2.7)                | Average B-factors (Å <sup>2</sup> )                  |                                                |                                                             |                                               |                            |                                                  |
|                                                  |                           | main chain                                           |                                                |                                                             | 25.2                                          |                            |                                                  |
|                                                  |                           | side chains                                          |                                                |                                                             | 26.6                                          |                            |                                                  |
|                                                  |                           | solvent                                              |                                                |                                                             | 35.5                                          |                            |                                                  |
|                                                  |                           | cofactors                                            |                                                |                                                             | 56.7                                          |                            |                                                  |
| <sup>a</sup> R <sub>merge</sub> overall          | 4.9 %                     |                                                      |                                                |                                                             |                                               |                            |                                                  |

<sup>a</sup>  $R_{merge} = \frac{\sum_{\mathbf{h}} \sum_{i=1}^{n_{\mathbf{h}}} | \langle I_{\mathbf{h}} \rangle - I_{hi} |}{\sum_{\mathbf{h}} \sum_{i=1}^{n_{\mathbf{h}}} | I_{hi} |}$ , where  $I_{hi}$  is an intensity value of  $i$ -th measurement of reflection  $\mathbf{h}$ ,  $\mathbf{h} = (h, k, l)$ , sum  $\sum_{\mathbf{h}}$  runs over all measured reflections, and  $\langle I_{\mathbf{h}} \rangle$  is an average measured intensity of the reflection  $\mathbf{h}$ . Number  $n_{\mathbf{h}}$

is a number of measurements of reflection  $h$ . Data were processed with MOSFLM [Leslie 2003] and further processed SCALA [Evans 1997] and TRUNCATE [French 1978] from CCP4 [CCP4 1994] package.

<sup>b</sup> Phasing power =  $\langle |F_h^{obs}| \rangle / r.m.s.d. \varepsilon$ , where  $\varepsilon$  is lack of closure.

<sup>c</sup> FOM – Figure of merit

<sup>d</sup>  $R_{crys, free} = \sum_h |F_h^{obs} - F_h^{calc}| / \sum_h |F_h^{obs}|$ , where  $F_h^{obs}$  and  $F_h^{calc}$  are observed and calculated structure factors, respectively.
