# Supplementary material
Source: PubMed Central journal article supplement (PMC1276096)

N-terminal domain

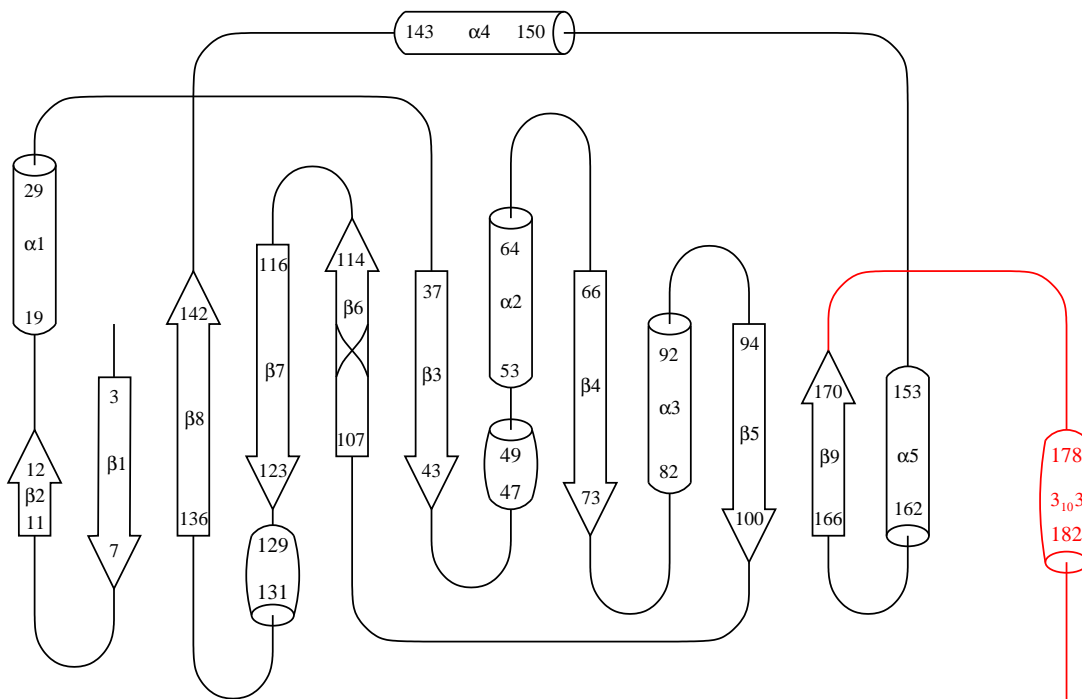

Linker

C-terminal domain

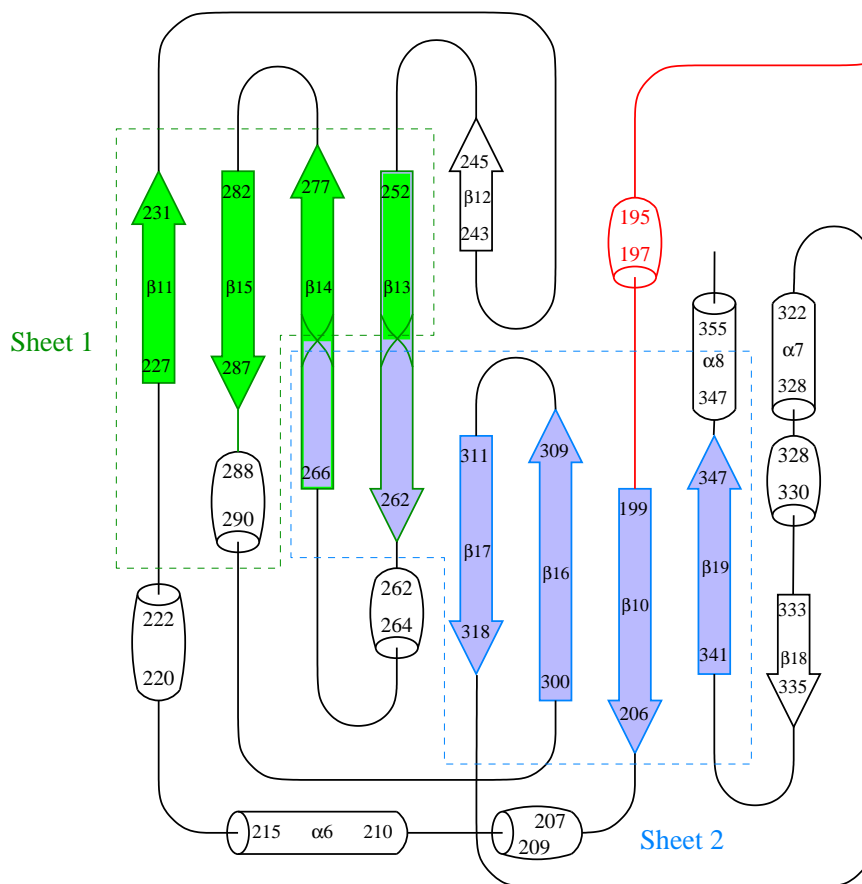

Sheet 1

Sheet 2

Supplement: pnas_0507949102_1.pdf [file pnas_0507949102_1.pdf]

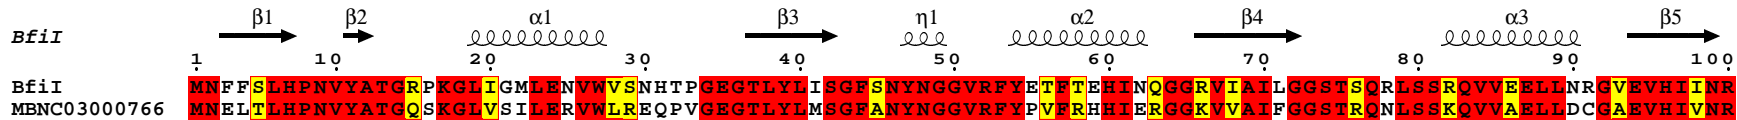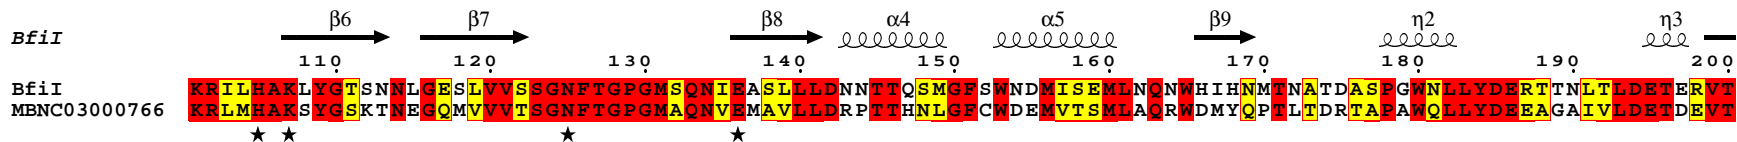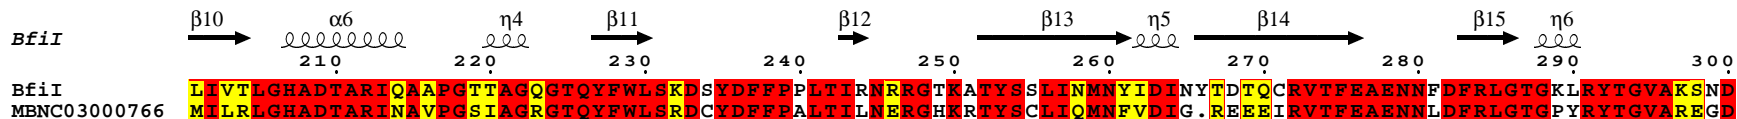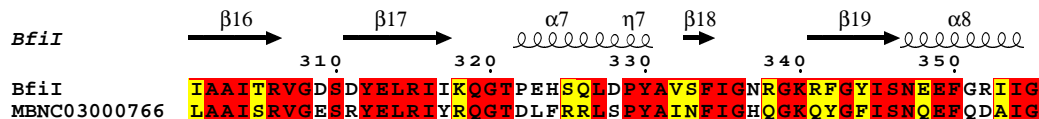

Supplement: pnas_0507949102_2.pdf [file pnas_0507949102_2.pdf]
